# Supplementary material
Source: PubMed Central journal article supplement (PMC4583088)
Supplement: supp_M058164_jlr.M058164-1.pdf [file supp_M058164_jlr.M058164-1.pdf]

**Supplementary Figure 1. Characterization of LpE.** **A**, GCM was subjected to sucrose density gradient ultracentrifugation, and twelve fractions were sequentially removed from the top of the tube. Fractions containing apo E were identified by dot-blot analysis. **B**, Equal protein amounts of LpE were separated by 12% polyacrylamide gel electrophoresis, and apo E was detected by immunoblotting. **C**, The intensities of the bands were quantitated and shown as means  $\pm$  S.D. ( $n = 3$ ).

**Supplementary Figure 2. Neurite measurements of neurons cultured with LpE secreted from cells nourished with SA or OA.** **A**, Two hours after hippocampal neurons were plated, the medium was changed to N2 medium with or without LpE, and hippocampal neurons were cultured for 3 days. Neurons were immunostained for class III  $\beta$ -tubulin. Scale bar, 100  $\mu$ m. **B–D**, Total neurite length, longest neurite length, and branch number per neuron were quantitated using ImageJ; data are expressed as means  $\pm$  s.e.m. [LpE (-),  $n = 60$ ; others,  $n = 45$ ]. \*,  $P < 0.05$ ; \*\*,  $P < 0.01$  compared with LpE (control).

**Supplementary Figure 3. Lipidomic analysis of neurons cultured with LpE secreted from glial cells nourished with PUFAs.** Two hours after hippocampal neurons were plated, the medium was replaced with N2 medium with or without LpE. Then, hippocampal neurons were cultured for 3 days. The lipids of neurons were extracted with chloroform/methanol (2:1), and subjected to LC-MS analysis.

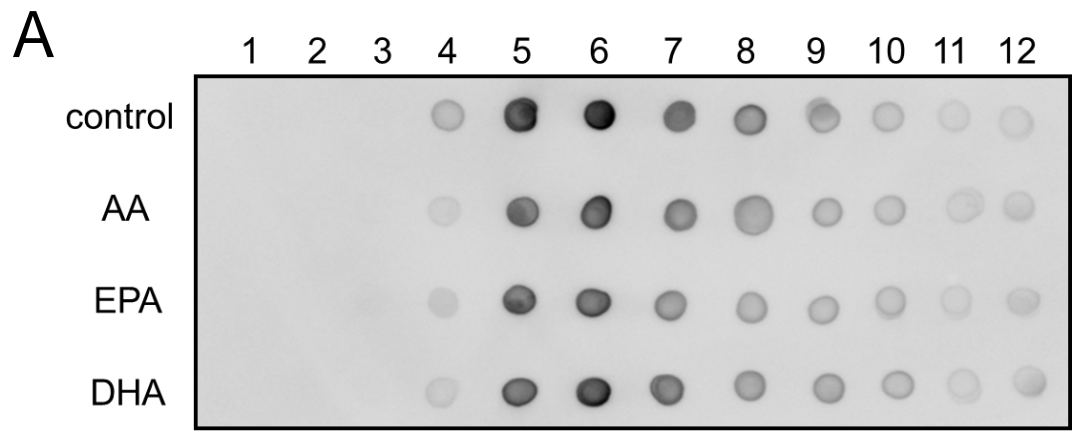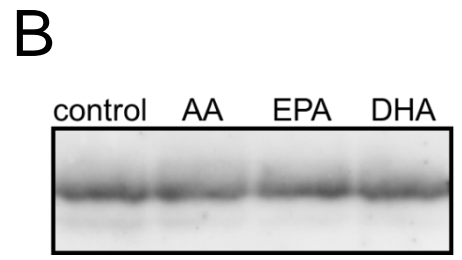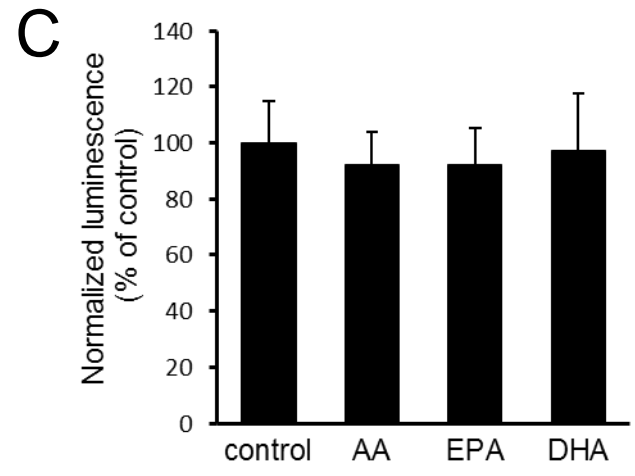

Supplementary Fig.1

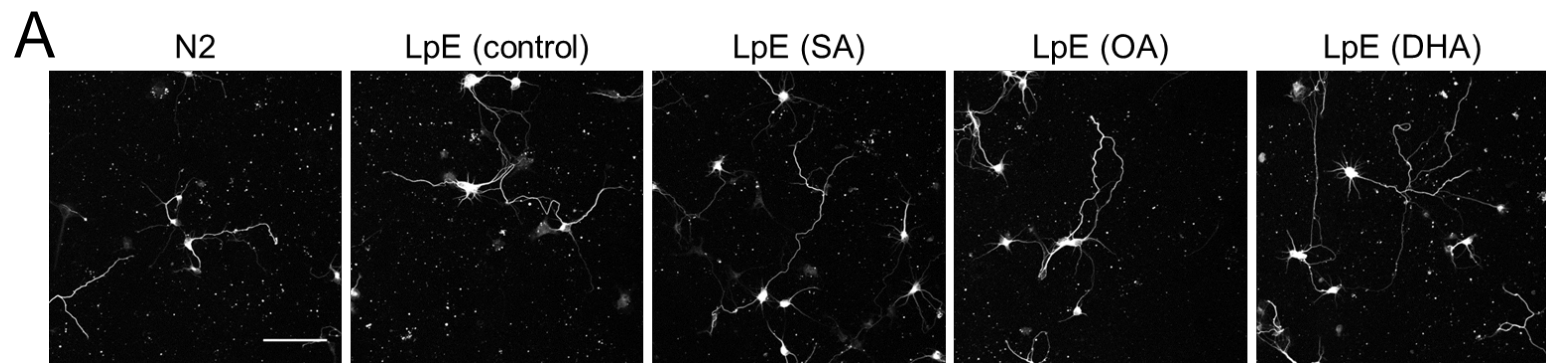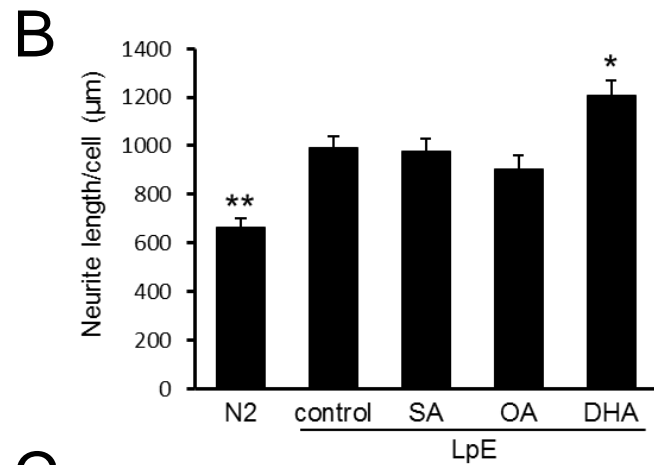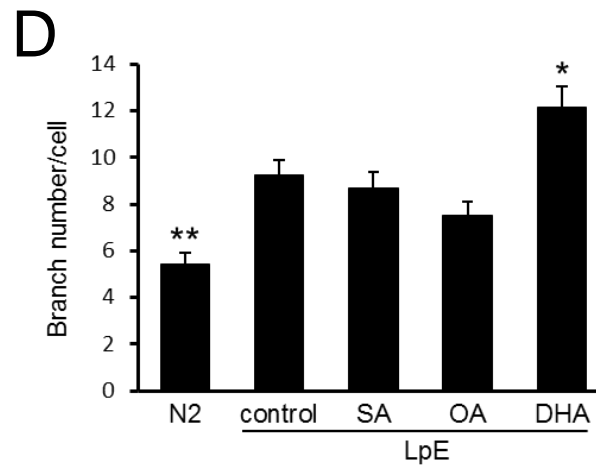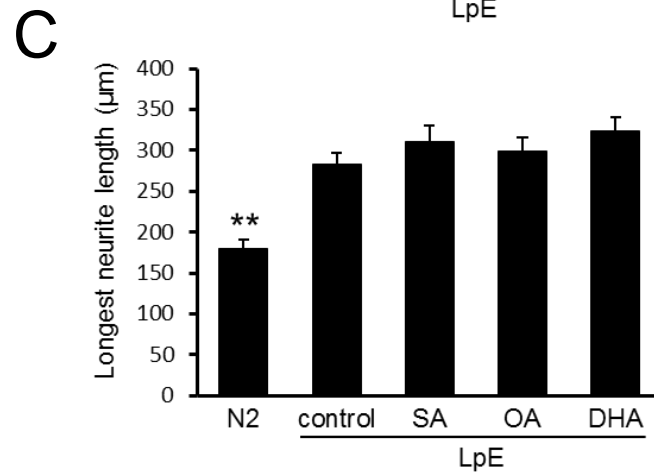

Supplementary Fig.2

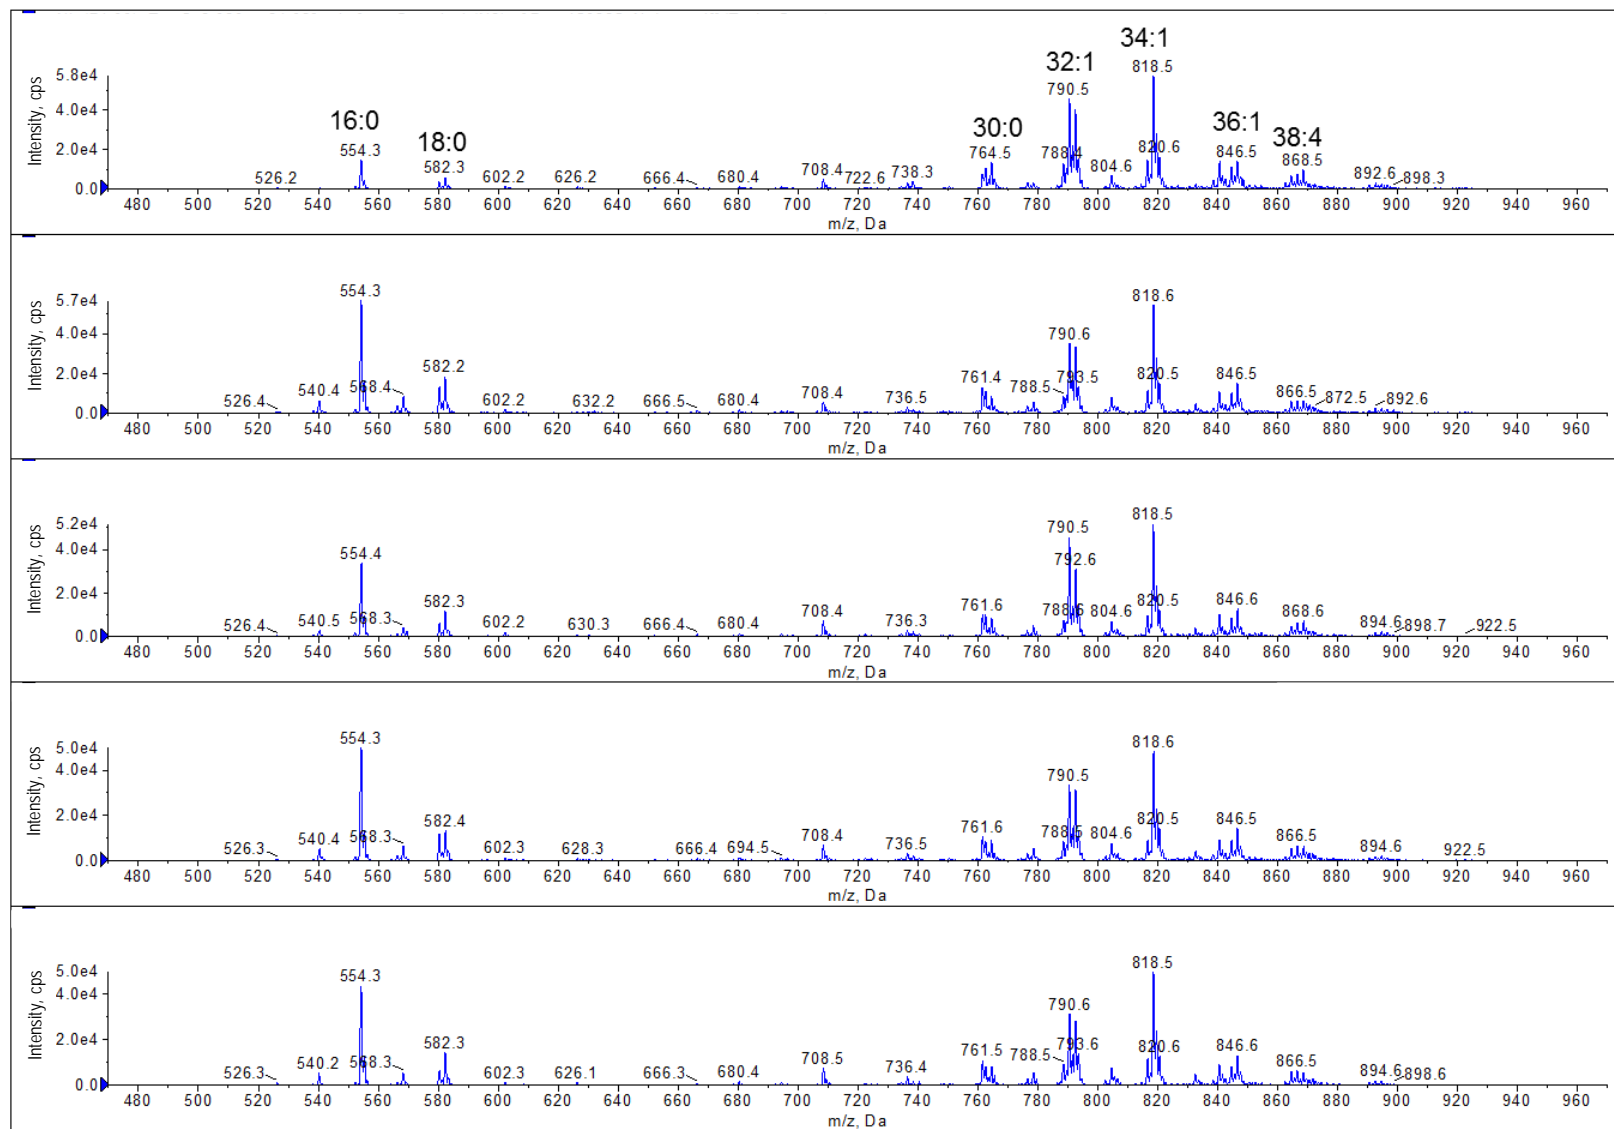

Supplementary Fig.3
